# Supplementary material for: POLD1 as a Prognostic Biomarker Correlated with Cell Proliferation and Immune Infiltration in Clear Cell Renal Cell Carcinoma
Source: MDPI journal article supplement (doi:10.3390/ijms24076849), 2023-04-06
Supplement: s1 [file s1]

**Supplementary Table S2. Correlation analysis between POLD1 and related genes and markers of Treg cell and T cell exhaustion in GEPIA.**

| Description       | Gene markers   | Kidney |           |        |           |       |           |
|-------------------|----------------|--------|-----------|--------|-----------|-------|-----------|
|                   |                | Tumor  |           | Normal |           | GTEx  |           |
|                   |                | R      | P         | R      | P         | R     | P         |
| Treg              | FOXP3          | 0.320  | 3.40E-14* | 0.390  | 7.20E-04* | 0.580 | 1.30E-03* |
|                   | CCR8           | 0.086  | 5.00E-02  | 0.093  | 4.40E-01  | 0.110 | 5.70E-01  |
|                   | STAT5B         | -0.190 | 9.20E-06* | 0.320  | 7.00E-03* | 0.760 | 5.60E-06* |
|                   | TGFβ(TGFB1)    | 0.230  | 1.90E-07* | 0.780  | 4.80E-16* | 0.870 | 1.10E-06* |
| T cell exhaustion | PD-1 (PDCD1)   | 0.340  | 5.40E-16* | -0.014 | 9.10E-01  | 0.550 | 2.30E-03* |
|                   | PDL1(PDCD1LG2) | -0.110 | 1.00E-02* | 0.250  | 3.60E-02* | 0.580 | 1.20E-03* |
|                   | CTLA4          | 0.290  | 8.80E-12* | 0.100  | 3.90E-01  | 0.590 | 9.80E-04* |
|                   | LAG3           | 0.380  | 3.40E-19* | 0.630  | 2.40E-09* | 0.810 | 1.90E-07* |
|                   | TIM-3 (HAVCR2) | -0.073 | 9.50E-02  | -0.430 | 1.90E-04* | 0.160 | 4.00E-01  |
|                   | GZMB           | 0.030  | 1.10E-12* | 0.0094 | 9.40E-01  | 0.091 | 6.40E-01  |

GTEx: Genotype-Tissue Expression; R: Value of Spearman's correlation; P: Statistical significance. \*  $P < 0.05$ .
