# Supplementary material for: POLD1 as a Prognostic Biomarker Correlated with Cell Proliferation and Immune Infiltration in Clear Cell Renal Cell Carcinoma
Source: MDPI journal article supplement (doi:10.3390/ijms24076849), 2023-04-06
Supplement: s1 [file s1]

**Supplementary Table S2. Clinicopathological characteristics in relation to POLD1 expression level in the validation cohort.**

| Characteristics         | Case<br>(N=60) | IHC score  |            | $\chi^2$ | P value            |
|-------------------------|----------------|------------|------------|----------|--------------------|
|                         |                | < 6 (%)    | >= 6 (%)   |          |                    |
| <b>Age</b>              |                |            |            | 6.89     | 0.009 <sup>a</sup> |
| <= 60                   | 38             | 20 (52.6%) | 18 (47.4%) |          |                    |
| >60                     | 22             | 4 (18.2%)  | 18 (81.8%) |          |                    |
| <b>Gender</b>           |                |            |            | 0        | 0.999              |
| Male                    | 35             | 14 (40.0%) | 21 (60.0%) |          |                    |
| Female                  | 25             | 10 (40.0%) | 15 (60.0%) |          |                    |
| <b>Histologic grade</b> |                |            |            | 1.35     | 0.245              |
| G1-G2                   | 32             | 15 (46.9%) | 17 (53.1%) |          |                    |
| G3-G4                   | 28             | 9 (32.1%)  | 19 (67.9%) |          |                    |
| <b>T stage</b>          |                |            |            | 1.60     | 0.206              |
| T1-T2                   | 42             | 19 (45.2%) | 23 (54.8%) |          |                    |
| T3-T4                   | 18             | 5 (27.8%)  | 13 (72.2%) |          |                    |
| <b>N stage</b>          |                |            |            | 4.94     | 0.008 <sup>a</sup> |
| N0                      | 51             | 24 (47.1%) | 27 (52.9%) |          |                    |
| N1                      | 9              | 0 (0%)     | 9 (100.0%) |          |                    |
| <b>M stage</b>          |                |            |            | 0.91     | 0.340 <sup>a</sup> |
| M0                      | 55             | 23 (41.8%) | 32 (58.2%) |          |                    |
| M1                      | 5              | 1 (20.0%)  | 4 (80.0%)  |          |                    |
| <b>Laterality</b>       |                |            |            | 0.19     | 0.662              |
| Left                    | 22             | 8 (36.4%)  | 14 (63.6%) |          |                    |
| Right                   | 38             | 16 (42.1%) | 22 (57.9%) |          |                    |
| <b>Tumor size</b>       |                |            |            | 0.18     | 0.673              |
| < 4cm                   | 28             | 12 (42.9%) | 16 (57.1%) |          |                    |
| >= 4cm                  | 32             | 12 (37.5%) | 20 (62.5%) |          |                    |
| <b>Status</b>           |                |            |            | 0.40     | 0.526 <sup>a</sup> |
| Alive                   | 56             | 23 (41.1%) | 33 (58.9%) |          |                    |
| Dead                    | 4              | 1 (25.0%)  | 3 (75.0%)  |          |                    |

Statistical significance was determined by Chi-square test (if necessary, results were adjusted by Yate's correction) or Fisher's exact test (<sup>a</sup>). IHC: Immunohistochemistry.
