# Supplementary material for: POLD1 as a Prognostic Biomarker Correlated with Cell Proliferation and Immune Infiltration in Clear Cell Renal Cell Carcinoma
Source: MDPI journal article supplement (doi:10.3390/ijms24076849), 2023-04-06
Supplement: s1 [file s1]

**Supplementary Table S1. Clinicopathological characteristics in relation to POLD1 expression level in the TCGA cohort.**

| Characteristics         | Patients | POLD1 expression |             | $\chi^2$ | P value                       |
|-------------------------|----------|------------------|-------------|----------|-------------------------------|
|                         |          | Low (%)          | High (%)    |          |                               |
| <b>Age</b>              |          |                  |             | 0.236    | 0.627                         |
| <= 60                   | 262      | 128 (48.8%)      | 134 (51.2%) |          |                               |
| >60                     | 251      | 129 (51.4%)      | 122 (48.6%) |          |                               |
| <b>Gender</b>           |          |                  |             | 1.858    | 0.173                         |
| Male                    | 337      | 161 (47.7%)      | 176 (52.3%) |          |                               |
| Female                  | 176      | 96 (54.6%)       | 80 (45.4%)  |          |                               |
| <b>Histologic grade</b> |          |                  |             | 10.833   | <b>0.027<sup>a</sup></b>      |
| G1                      | 12       | 5 (41.6%)        | 7 (58.4%)   |          |                               |
| G2                      | 219      | 121 (55.3%)      | 98 (44.7%)  |          |                               |
| G3                      | 201      | 99 (49.2%)       | 102 (50.8%) |          |                               |
| G4                      | 73       | 26 (35.6%)       | 47 (64.4%)  |          |                               |
| Gx                      | 8        | 6 (75%)          | 2 (25%)     |          |                               |
| <b>Pathologic stage</b> |          |                  |             | 16.331   | <b>0.001<sup>a</sup></b>      |
| Stage I                 | 255      | 142 (55.7%)      | 113 (44.3%) |          |                               |
| Stage II                | 56       | 28 (50%)         | 28 (50%)    |          |                               |
| Stage III               | 117      | 61 (52.2%)       | 56 (47.8%)  |          |                               |
| Stage IV                | 82       | 25 (30.4%)       | 57 (69.6%)  |          |                               |
| NA                      | 3        | 1 (33.3%)        | 2 (66.7%)   |          |                               |
| <b>T stage</b>          |          |                  |             | 9.581    | <b>0.022<sup>a</sup></b>      |
| T1                      | 261      | 145 (55.6%)      | 116 (44.4%) |          |                               |
| T2                      | 68       | 32 (47%)         | 36 (52.9%)  |          |                               |
| T3                      | 173      | 78 (45%)         | 95 (55%)    |          |                               |
| T4                      | 11       | 2 (18.1%)        | 9 (81.9%)   |          |                               |
| <b>N stage</b>          |          |                  |             | 4.172    | 0.132 <sup>a</sup>            |
| N0                      | 229      | 116 (50.7%)      | 113 (49.3%) |          |                               |
| N1                      | 16       | 4 (25%)          | 12 (75%)    |          |                               |
| Nx                      | 268      | 137 (51.2%)      | 131 (48.8%) |          |                               |
| <b>M stage</b>          |          |                  |             | 35.724   | <b>&lt; 0.001<sup>a</sup></b> |
| M0                      | 407      | 230 (56.6%)      | 177 (43.4%) |          |                               |
| M1                      | 78       | 24 (30.7%)       | 54 (69.3%)  |          |                               |
| Mx                      | 28       | 3 (10.7%)        | 25 (89.3%)  |          |                               |
| <b>OS event</b>         |          |                  |             | 7.082    | <b>0.008</b>                  |
| Alive                   | 334      | 187 (54.4%)      | 157 (45.6%) |          |                               |
| Dead                    | 169      | 70 (41.4%)       | 99 (58.6%)  |          |                               |
| <b>PFS event</b>        |          |                  |             | 6.775    | <b>0.009</b>                  |
| No                      | 353      | 191 (54.2%)      | 162 (45.8%) |          |                               |
| Yes                     | 160      | 66 (41.2%)       | 94 (58.8%)  |          |                               |
| <b>DSS event</b>        |          |                  |             | 14.541   | <b>&lt; 0.001</b>             |
| No                      | 405      | 221 (54.6%)      | 184 (45.4%) |          |                               |
| Yes                     | 108      | 36 (33.3%)       | 72 (66.7%)  |          |                               |

Statistical significance was determined by Chi-square test (if necessary, results were adjusted by Yate's correction) or Fisher's exact test (<sup>a</sup>). OS: Overall survival; PFS: Progression free survival; DSS: Disease specific survival.
