# Supplementary material for: POLD1 as a Prognostic Biomarker Correlated with Cell Proliferation and Immune Infiltration in Clear Cell Renal Cell Carcinoma
Source: Int J Mol Sci. 2023 Apr 6;24(7):6849. doi: 10.3390/ijms24076849 (PMC10095303; doi:10.3390/ijms24076849)
Supplement: Supplementary file 1 [file ijms-24-06849-s001.zip]

Archive with 9 entries (9 files):
- Supplementary Figure 1.tif
- Supplementary Figure 2.tif
- Supplementary Figure 3.tif
- Supplementary Figure 4.tif
- Supplementary Figure 5.tif
- Supplementary Figures caption.pdf
- Supplementary Table S1. Clinicopathological characteristics in relation to POLD1 expression level in the TCGA cohort.pdf
- Supplementary Table S2. Clinicopathological characteristics in relation to POLD1 expression level in the validation cohort.pdf
- Supplementary Table S3. Correlation analysis between POLD1 and related genes and markers of Treg cell and T cell exhaustion in GEPIA.pdf
